# Supplementary material for: Fabrication of CdS hierarchical multi-cavity hollow particles for efficient visible light CO2 reduction
Source: Royal Society of Chemistry journal article supplement (doi:10.1039/c8ee02538j), 2018-11-07
Supplement: c8ee02538j1.pdf [file c8ee02538j1.pdf]

## Electronic Supplementary Information

---

### **Fabrication of CdS hierarchical multi-cavity hollow particles for efficient visible light CO<sub>2</sub> reduction**

*Peng Zhang,<sup>#</sup> Sibong Wang,<sup>#</sup> Bu Yuan Guan and Xiong Wen (David) Lou\**

School of Chemical and Biomedical Engineering, Nanyang Technological University, 62 Nanyang Drive, Singapore, 637459, Singapore

\* Corresponding author. E-mail: xwlou@ntu.edu.sg; davidlou88@gmail.com

<sup>#</sup> These authors contribute equally to this work.

#### **Experimental details**

*Synthesis of Co-G SSs:* 0.375 mmol of Co(NO<sub>3</sub>)<sub>2</sub>·6H<sub>2</sub>O was dissolved in 40 mL of isopropanol. Then, 12 mL of glycerol was added to form a transparent solution, which was transferred to a Teflon-lined stainless steel autoclave and kept at 130 °C for 6 h. The products were collected by centrifugation and washed with ethanol 3 times, which were then dried in an oven at 70 °C.

*Synthesis of Co-G@ZIF-8 HSSs:* 2 mg of as-prepared Co-G SSs was dissolved in 10 mL of 10 mM Zn(NO<sub>3</sub>)<sub>2</sub>·6H<sub>2</sub>O methanol solution for 10 min. Then, 10 mL of 10 mM 2-methylimidazole methanol solution was added. After reaction for 15 min, the products were collected by centrifugation and washed with ethanol 3 times.

*Synthesis of CoS<sub>x</sub>@ZnS HMCHPs:* The obtained Co-G@ZIF-8 HSSs were transferred into 5 mL of ethanol solution containing 20 mg of thioacetamide. Solvothermal sulfidation reaction was conducted at 120 °C for 1 h. The obtained CoS<sub>x</sub>@ZnS HMCHPs were collected by centrifugation and washed with ethanol 3 times.

*Synthesis of CdS HMCHPs:* The obtained  $\text{CoS}_x\text{@ZnS}$  HMCHPs were transferred into 5 mL of aqueous solution containing 10 mg of  $\text{CdCl}_2 \cdot x\text{H}_2\text{O}$ . Hydrothermal cation-exchange reaction was conducted at 120 °C for 4 h. The obtained CdS HMCHPs were collected by centrifugation and washed with ethanol 3 times, which were then dried in an oven at 70 °C.

*Synthesis of CdS SSs:* 0.25 mmol of cadmium acetate and 1.25 mmol of thiourea were dissolved in 18 mL of  $\text{H}_2\text{O}$ . The solution was transferred to a Teflon-lined stainless steel autoclave and kept at 140 °C for 5 h. The obtained CdS SSs were collected by centrifugation and washed with ethanol 3 times, which were then dried in an oven at 70 °C.

*Synthesis of CdS HSs:* 2 mg of as-prepared Co-G SSs was transferred into 5 mL of ethanol solution containing 20 mg of thioacetamide. Solvothermal sulfidation reaction was conducted at 120 °C for 1 h. The obtained  $\text{CoS}_x$  HSs were collected by centrifugation and washed with ethanol 3 times. Then, the  $\text{CoS}_x$  HSs were transferred into 5 mL of aqueous solution containing 10 mg of  $\text{CdCl}_2 \cdot x\text{H}_2\text{O}$ . Hydrothermal cation-exchange reaction was conducted at 120 °C for 4 h. The obtained CdS HSs were collected by centrifugation and washed with ethanol 3 times, which were then dried in an oven at 70 °C.

*Synthesis of Au@CdS HMCHPs:* 8 mg of CdS HMCHPs was dissolved in 10 mL of  $\text{H}_2\text{O}$ . Then, certain volume (50 uL, 100 uL or 200 uL) of 1 mM aqueous solution of  $\text{HAuCl}_4$  was added under vigorous stirring for 1 h. The obtained Au@CdS HMCHPs were collected by centrifugation and washed with ethanol 3 times, which were then dried in an oven at 70 °C.

*Materials characterization.* The crystal phase was examined by X-ray diffraction (XRD) on a Bruker D2 Phaser X-Ray Diffractometer. Field-emission scanning electron microscope (FESEM; JEOL-6700F) and transmission electron microscope (TEM; JEOL, JEM-2010) were used to characterize the morphology and structure. The composition was analyzed by energy-dispersive X-ray (EDX) spectroscope attached to the FESEM instrument. The light absorption ability was characterized by ultraviolet-visible (UV-Vis) spectroscopy (Shimadzu, UV-2450). The content of Au was measured by ICP-OES (Optima 5300 V, PerkinElmer). PL spectra are collected by a fluorescence spectrometer (PerkinElmer, LS 55) with an excitation wavelength of 350 nm. Transient photocurrent densities were characterized using a three-electrode cell with the electrophoretic-deposited working electrode, saturated Ag/AgCl as the reference electrode and platinum foil as the counter electrode. An aqueous solution containing 0.5 M  $\text{Na}_2\text{SO}_4$  was used as the electrolyte. The working electrode was irradiated by a 300W Xe lamp with a 400 nm longpass cutoff filter. Nyquist plots were collected by measuring the electrochemical impedance spectra (EIS) in

a frequency range of 10 kHz to 1 Hz at the open circuit potential. Both transient photocurrent densities and EIS were collected using an electrochemical workstation (CHI760e, CH Instruments).

*Photocatalytic CO<sub>2</sub> reduction.* Typically, 4 mg of photocatalyst, 15 mg of 2,2'-bipyridine (bpy), 2 μmol of CoCl<sub>2</sub>, 1 mL of triethanolamine (TEOA), 2 mL of H<sub>2</sub>O and 3 mL of acetonitrile (MeCN) were added into a gas-closed glass reactor (80 mL in capacity). Then, high purity CO<sub>2</sub> was introduced into the reactor with a partial pressure of 1 atm. A 300W Xe lamp with a 400 nm longpass cutoff filter was used as the light source. During the photocatalytic process, the reaction system was vigorously stirred by a magnetic stirrer. After each reaction, the generated products from the CO<sub>2</sub> photoreduction system were quantified by an Agilent 7890B gas chromatograph (GC) equipped with a thermal conductivity detector (TCD) and a packed column (TDX-01). Ar was used as the carrier gas. To evaluate the wavelength-dependent CO<sub>2</sub> photoreduction performance of the sample, the wavelength of incident light was controlled by applying appropriate long-pass cutoff filters (e.g., 400, 420, 455, and 495 nm). Other reaction conditions were the same as those of the normal reaction. To check the carbon source of CO, <sup>13</sup>C-labelled isotope experiments were conducted using <sup>13</sup>CO<sub>2</sub> as the reactant and the produced gases were analysed by GC-mass spectrometry (GC-MS). Liquid products were analysed by GC-MS, nuclear magnetic resonance (NMR), and high-performance liquid chromatography (HPLC). Apparent quantum yield (AQY) of the photocatalytic CO<sub>2</sub> reduction system was determined under monochromatic light irradiation with a wavelength of 420 nm. The equation for the calculation is as follows.

$$\text{AQY (\%)} = \frac{(\text{number of produced molecules}) \times 2}{(\text{number of photons})} \times 100\%$$

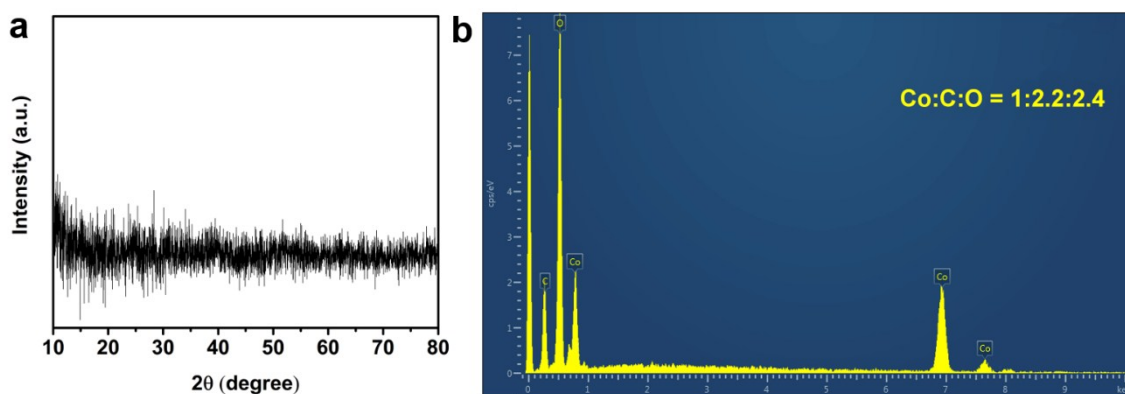

**Fig. S1** (a) XRD pattern and (b) EDX spectrum of Co-G SSs.

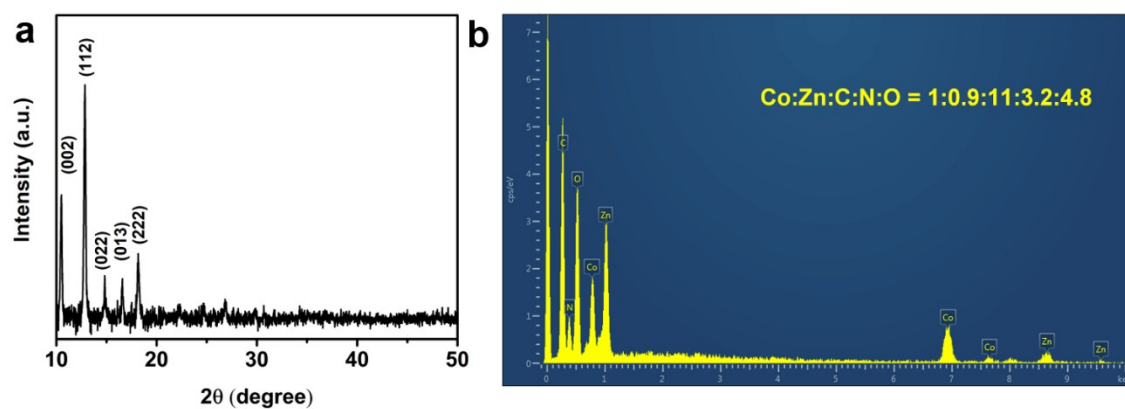

**Fig. S2** (a) XRD pattern and (b) EDX spectrum of Co-G@ZIF-8 HSSs.

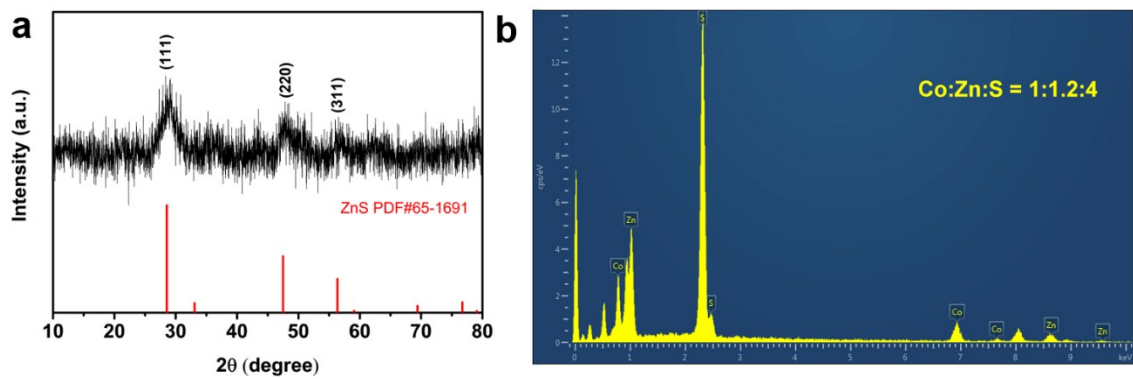

**Fig. S3** (a) XRD pattern and (b) EDX spectrum of  $\text{CoS}_x\text{@ZnS}$  HMCHPs.

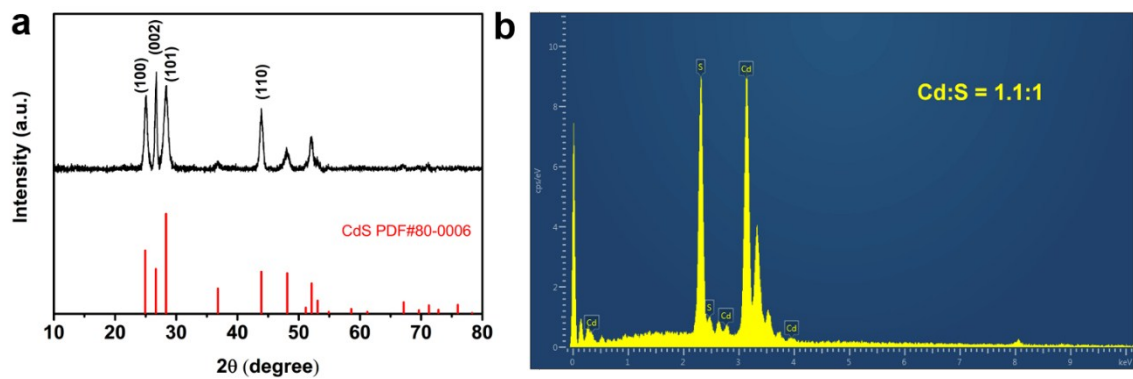

**Fig. S4** (a) XRD pattern and (b) EDX spectrum of CdS HMCHPs.

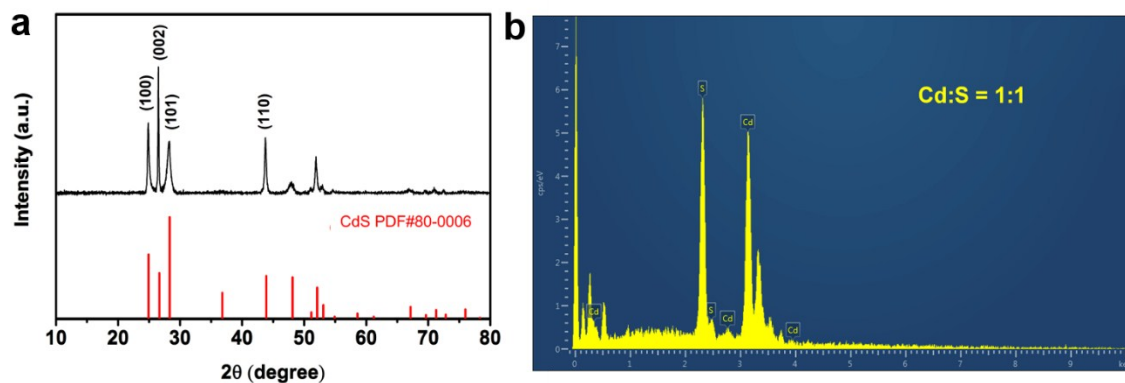

**Fig. S5** (a) XRD pattern and (b) EDX spectrum of CdS SSs.

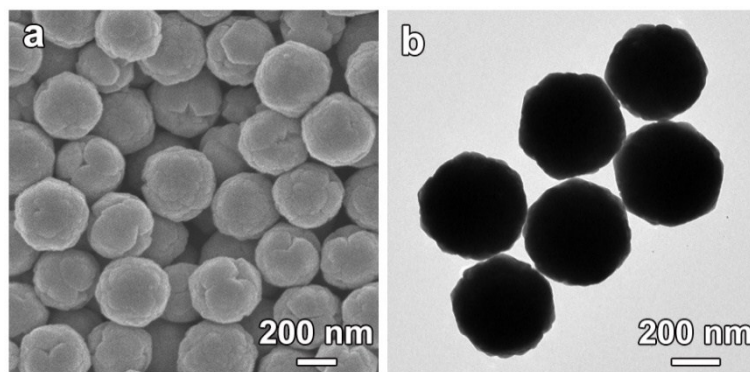

**Fig. S6** (a) FESEM and (b) TEM images of CdS SSs.

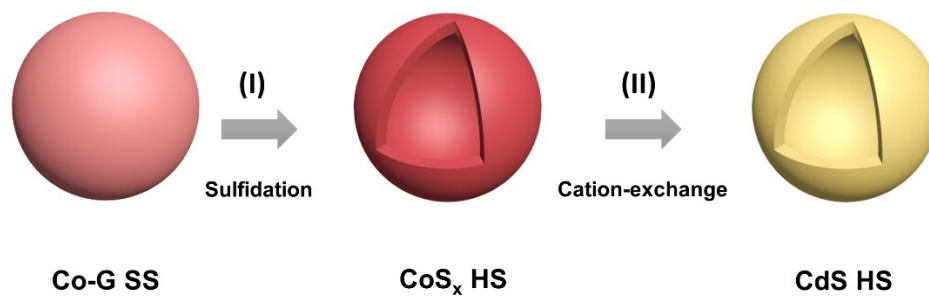

**Fig. S7** Schematic illustration of the formation process of CdS HS. (I) Conversion of Co-G SS into CoS<sub>x</sub> HS via a sulfidation treatment. (II) Conversion of CoS<sub>x</sub> HS into CdS HS through a cation-exchange reaction.

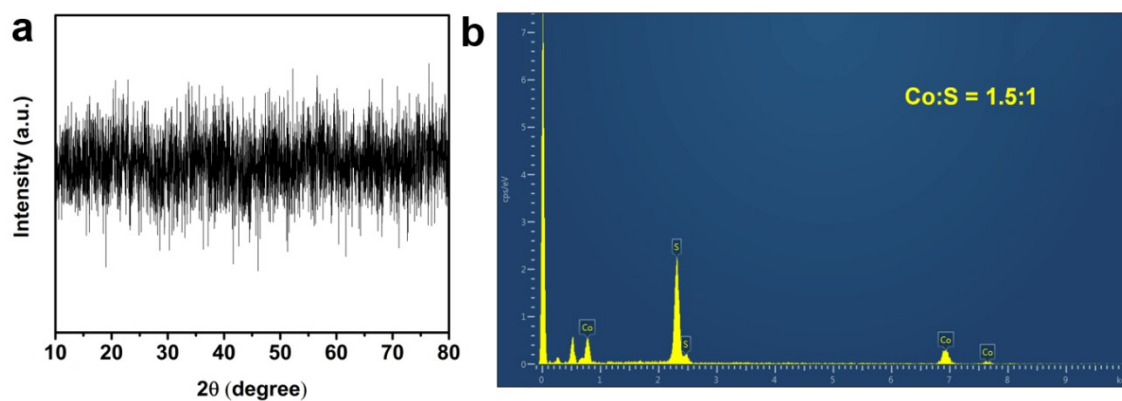

**Fig. S8** (a) XRD pattern and (b) EDX spectrum of CoS<sub>x</sub> HSs.

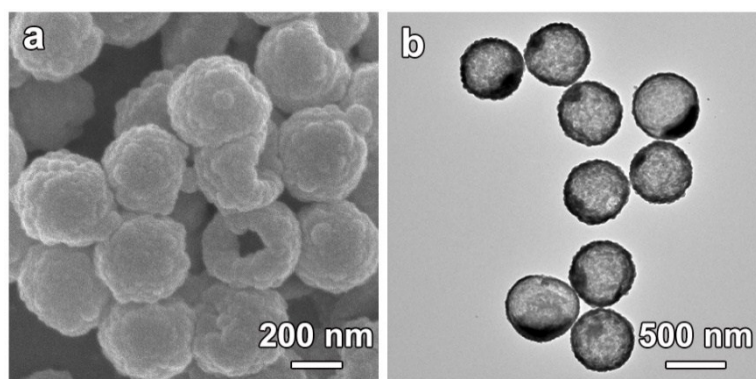

**Fig. S9** (a) FESEM and (b) TEM images of  $\text{CoS}_x$  HSs.

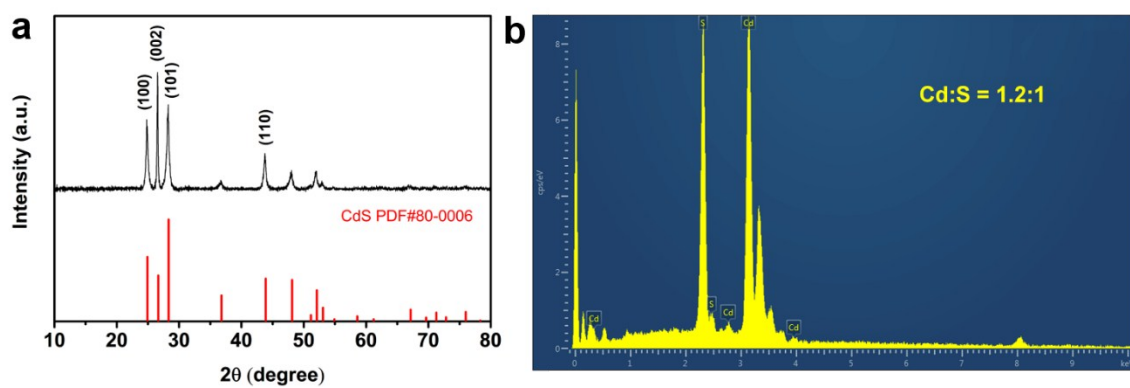

**Fig. S10** (a) XRD pattern and (b) EDX spectrum of CdS HSs.

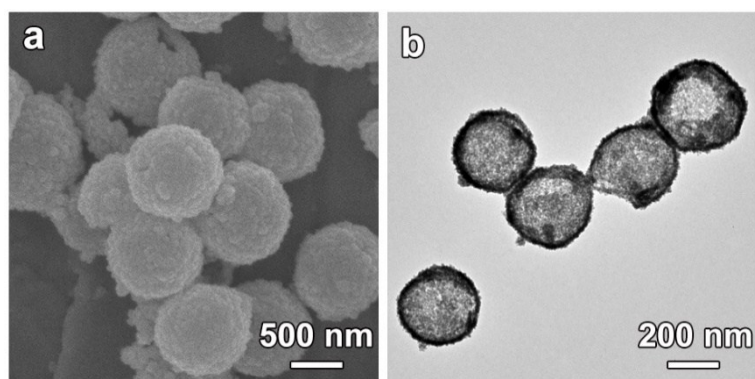

**Fig. S11** (a) FESEM and (b) TEM images of CdS HSs.

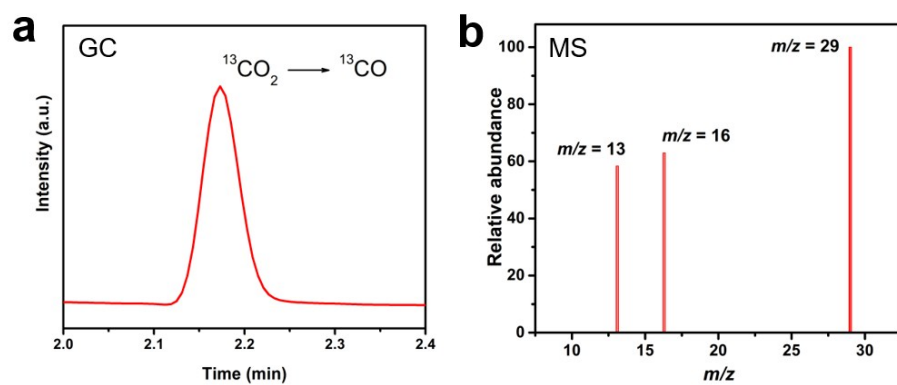

**Fig. S12** (a) GC and (b) MS spectra of GC-MS analysis of produced CO from the  $\text{CO}_2$  reduction system using  $^{13}\text{CO}_2$  as the gas feedstock.

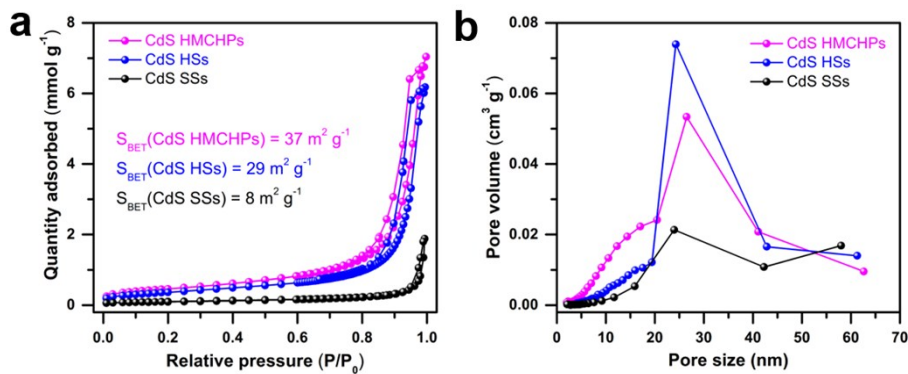

**Fig. S13.** (a) N<sub>2</sub> sorption isotherms and (b) the corresponding pore size distribution plots of CdS SSs, CdS HSs and CdS HMCHPs.

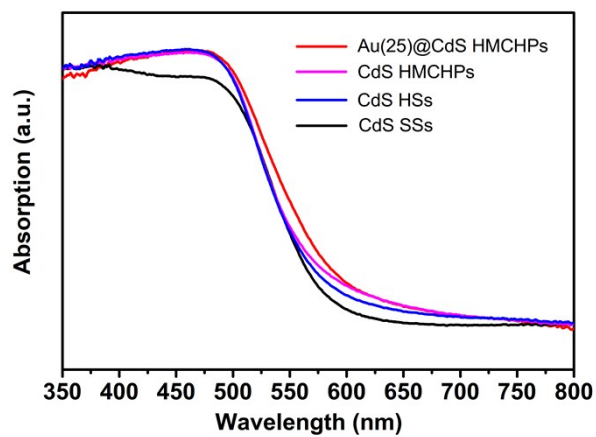

**Fig. S14** UV-Vis absorption spectra of CdS SSs, CdS HSs, CdS HMCHPs and Au(25)@CdS HMCHPs.

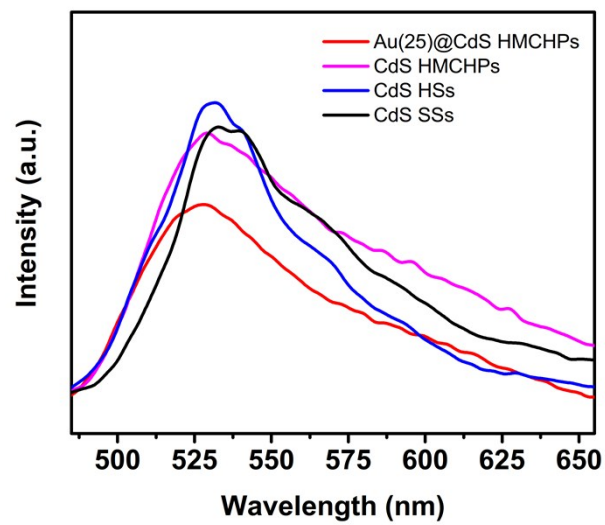

**Fig. S15** PL spectra of CdS SSs, CdS HSs, CdS HMCHPs and Au(25)@CdS HMCHPs.

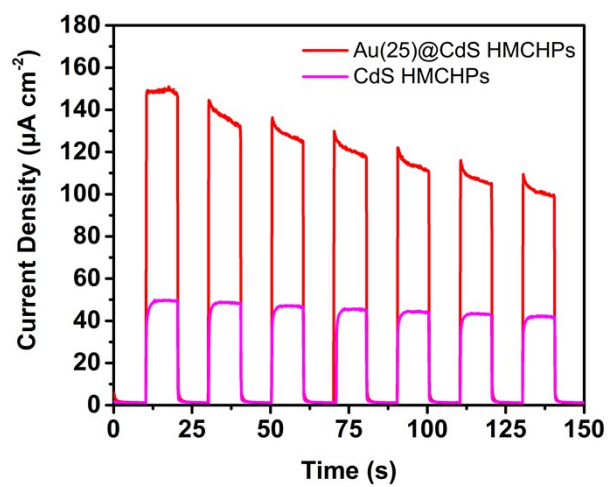

**Fig. S16** Transient photocurrent densities of CdS HMCHPs and Au(25)@CdS HMCHPs.

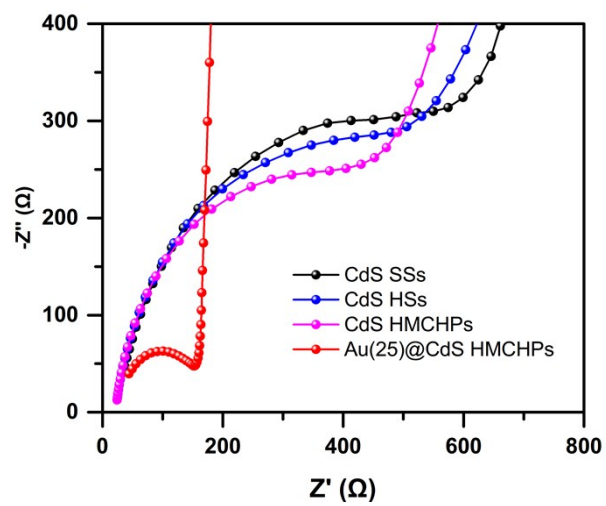

**Fig. S17** Nyquist plots of EIS for CdS SSs, CdS HSs, CdS HMCHPs and Au(25)@CdS HMCHPs.

**Table S1.** Comparison of CO<sub>2</sub> photoreduction performance of different photocatalysts.

| Catalyst                                                         | Cocatalyst                         | Sacrificial agent               | Major product: evolution rate ( $\mu\text{mol h}^{-1} \text{g}^{-1}$ ) | Ref.      |
|------------------------------------------------------------------|------------------------------------|---------------------------------|------------------------------------------------------------------------|-----------|
| Au@CdS                                                           | Co(bpy) <sub>3</sub> <sup>2+</sup> | TEOA                            | CO: 3758                                                               | This work |
| CdS/BCN                                                          | Co(bpy) <sub>3</sub> <sup>2+</sup> | TEOA                            | CO: 250                                                                | 1         |
| HR-CN                                                            | Co(bpy) <sub>3</sub> <sup>2+</sup> | TEOA                            | CO: 297                                                                | 2         |
| BCN                                                              | Co(bpy) <sub>3</sub> <sup>2+</sup> | TEOA                            | CO: 94                                                                 | 3         |
| ZnIn <sub>2</sub> S <sub>4</sub> -In <sub>2</sub> O <sub>3</sub> | Co(bpy) <sub>3</sub> <sup>2+</sup> | TEOA                            | CO: 3075                                                               | 4         |
| In <sub>2</sub> S <sub>3</sub> -CdIn <sub>2</sub> S <sub>4</sub> | Co(bpy) <sub>3</sub> <sup>2+</sup> | TEOA                            | CO: 825                                                                | 5         |
| CuCo <sub>2</sub> O <sub>4</sub> /CdS                            | Co(bpy) <sub>3</sub> <sup>2+</sup> | TEOA                            | CO: 2000                                                               | 6         |
| Co(II)/CdS                                                       | N.A.                               | Na <sub>2</sub> SO <sub>3</sub> | CO: 392                                                                | 7         |
| Ag/CdS                                                           | N.A.                               | TEOA                            | CO: 260                                                                | 8         |
| Co-ZIF-9/CdS                                                     | bpy                                | TEOA                            | CO: 2520                                                               | 9         |
| CdS-WO <sub>3</sub>                                              | N.A.                               | N.A.                            | CH <sub>4</sub> : 1.02                                                 | 10        |
| Bi <sub>2</sub> WO <sub>6</sub> /Au/CdS                          | N.A.                               | N.A.                            | CH <sub>4</sub> : 1.52                                                 | 11        |
| Fe <sub>2</sub> V <sub>4</sub> O <sub>13</sub> /RGO/CdS          | N.A.                               | N.A.                            | CH <sub>4</sub> : ~2.2                                                 | 12        |
| (Mo-Bi)S <sub>x</sub> /CdS                                       | N.A.                               | N.A.                            | HCOOH: 208                                                             | 13        |

**Supplementary References:**

1. M. Zhou, S. Wang, P. Yang, C. Huang and X. Wang, *ACS Catal.*, 2018, **8**, 4928.
2. Y. Zheng, L. Lin, X. Ye, F. Guo and X. Wang, *Angew. Chem. Int. Ed.*, 2014, **53**, 11926.
3. C. Huang, C. Chen, M. Zhang, L. Lin, X. Ye, S. Lin, M. Antonietti and X. Wang, *Nat. Commun.*, 2015, **6**, 7698.
4. S. Wang, B. Y. Guan and X. W. Lou, *J. Am. Chem. Soc.*, 2018, **140**, 5037.
5. S. Wang, B. Y. Guan, Y. Lu and X. W. Lou, *J. Am. Chem. Soc.*, 2017, **139**, 17305.
6. M. Jiang, Y. Gao, Z. Wang and Z. Ding, *Appl. Catal., B*, 2016, **198**, 180.

7. G. Zhao, W. Zhou, Y. Sun, X. Wang, H. Liu, X. Meng, K. Chang and J. Ye, *Appl. Catal., B*, 2018, **226**, 252.
8. Z. Zhu, J. Qin, M. Jiang, Z. Ding and Y. Hou, *Appl. Surf. Sci.*, 2017, **391**, 572.
9. S. Wang and X. Wang, *Appl. Catal., B*, 2015, **162**, 494.
10. J. Jin, J. Yu, D. Guo, C. Cui and W. Ho, *Small*, 2015, **11**, 5262.
11. W. Meng, H. Qiutong, L. Liang, T. Lanqin, L. Haijin, Z. Yong and Z. Zhigang, *Nanotechnology*, 2017, **28**, 274002.
12. P. Li, Y. Zhou, H. Li, Q. Xu, X. Meng, X. Wang, M. Xiao and Z. Zou, *Chem. Commun.*, 2015, **51**, 800.
13. B. Zhou, J. Song, C. Xie, C. Chen, Q. Qian and B. Han, *ACS Sustainable Chem. Eng.*, 2018, **6**, 5754.
